# Supplementary material for: FRZB as a key molecule in abdominal aortic aneurysm progression affecting vascular integrity
Source: PubMed Central journal article supplement (PMC7789806; doi:10.1042/bsr20203204), 2021-01-06
Supplement: BSR-2020-3204_supp.pdf [file BSR-2020-3204_supp.pdf]

| Score          | Expect | Method                                                        | Identities   | Positives    | Gaps       |
|----------------|--------|---------------------------------------------------------------|--------------|--------------|------------|
| 446 bits(1148) | 1e-163 | Compositional matrix adjust.                                  | 210/301(70%) | 248/301(82%) | 19/301(6%) |
| Query 8        |        | GMLLLRAGLLALAALCLLRVP-GARAAACEPVRIPLCKSLPWNMTKMPNHLHHSTQANA I |              |              | 66         |
| Sbjct 3        |        | M + LA CLL +P G AA+CEP+RIP+CKS+PWNMTKMPNHLHHSTQANA+           |              |              | 62         |
| Query 67       |        | LAIEQFEGLLGTHCSPDLLFFLCANYAPICTIDFQHEPIKPKSVCERARQGCEPILIKY   |              |              | 126        |
| Sbjct 63       |        | LAIEQFEGLLGT CS DLLFFLCANYAPICTIDFQH+PIKPKSVCERA+ GCEP++ +Y   |              |              | 122        |
| Query 127      |        | RHSWPENLACEELPVYDRGVCISPEAIVTADG-----ADFPMDSSNGN              |              |              | 169        |
| Sbjct 123      |        | H+WPE+LACEELPVYDRGVCISPEAIV A+G DFPMD S N N                   |              |              | 182        |
| Query 170      |        | CRGASSERCKCKPIRATQKTYFRNNYVYIRAKVKEIKTKCHDVTAVVEVKEILKSSLVN   |              |              | 229        |
| Sbjct 183      |        | C+GA ++RCKCK ++ QKTY +NNYVYIRA+VKEI+ + HD++A+VEVKE+LKSSLVN    |              |              | 241        |
| Query 230      |        | IPRDTVNLVTSSGCLCPPLNVNEEYIIMGYEDEERSRLLLVEGSI AEKWKDRLGKKVKRW |              |              | 289        |
| Sbjct 242      |        | IPRDTV LY +SGCLCPPL N+EYIIMGYE+EERSRLLL++ SIA+KWK+++G+KVKRW   |              |              | 301        |
| Query 290      | D      | 290                                                           |              |              |            |
| Sbjct 302      | D      | 302                                                           |              |              |            |

**Supplementary Figure 1.** *frzb* is evolutionally conserved in the vertebrate.

Alignment of amino acid sequence between human *FRZB* (Query) and zebrafish *frzb*

(Subject).
